# Supplementary material
Source: PubMed Central journal article supplement (PMC3607394)
Supplement: NIHMS442490-supplement-Supporting_Information.pdf [file NIHMS442490-supplement-Supporting_Information.pdf]

# Supporting Information

## **An Improved Synthesis of BrettPhos and RockPhos-Type Biarylphosphine Ligands**

Naoyuki Hoshiya and Stephen L. Buchwald\*

*Department of Chemistry, Massachusetts Institute of Technology,  
77 Massachusetts Avenue, Cambridge, MA 02139, USA.*

E-mail: [sbuchwal@mit.edu](mailto:sbuchwal@mit.edu)

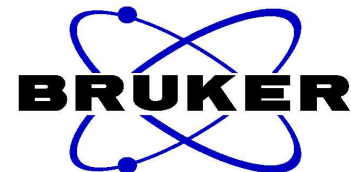

Current Data Parameters  
NAME NH5-91-2-1st  
EXPNO 1  
PROCNO 1

F2 - Acquisition Parameters  
Date\_ 20111223  
Time 19.42  
INSTRUM spect  
PROBHD 5 mm QNP 1H/13  
PULPROG zg30  
TD 65536  
SOLVENT CDC13  
NS 8  
DS 2  
SWH 8278.146 Hz  
FIDRES 0.126314 Hz  
AQ 3.9584243 sec  
RG 6502  
DW 60.400 usec  
DE 6.00 usec  
TE 683.2 K  
D1 1.00000000 sec  
TD0 1

===== CHANNEL f1 =====  
NUC1 1H  
P1 14.00 usec  
PL1 0.00 dB  
SFO1 400.1324710 MHz

F2 - Processing parameters  
SI 65536  
SF 400.1300096 MHz  
WDW no  
SSB 0  
LB 0.00 Hz  
GB 0  
PC 1.00

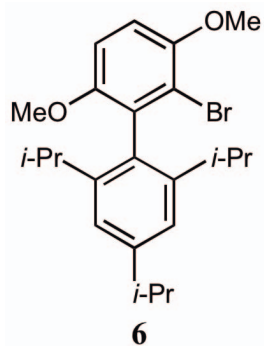

7.053  
6.902  
6.880  
6.869  
6.847

3.913  
3.665  
3.009  
2.991  
2.974  
2.957  
2.939  
2.922  
2.905  
2.452  
2.435  
2.418  
2.400  
2.383  
2.366  
2.349  
1.321  
1.304  
1.152  
1.135  
1.027  
1.009

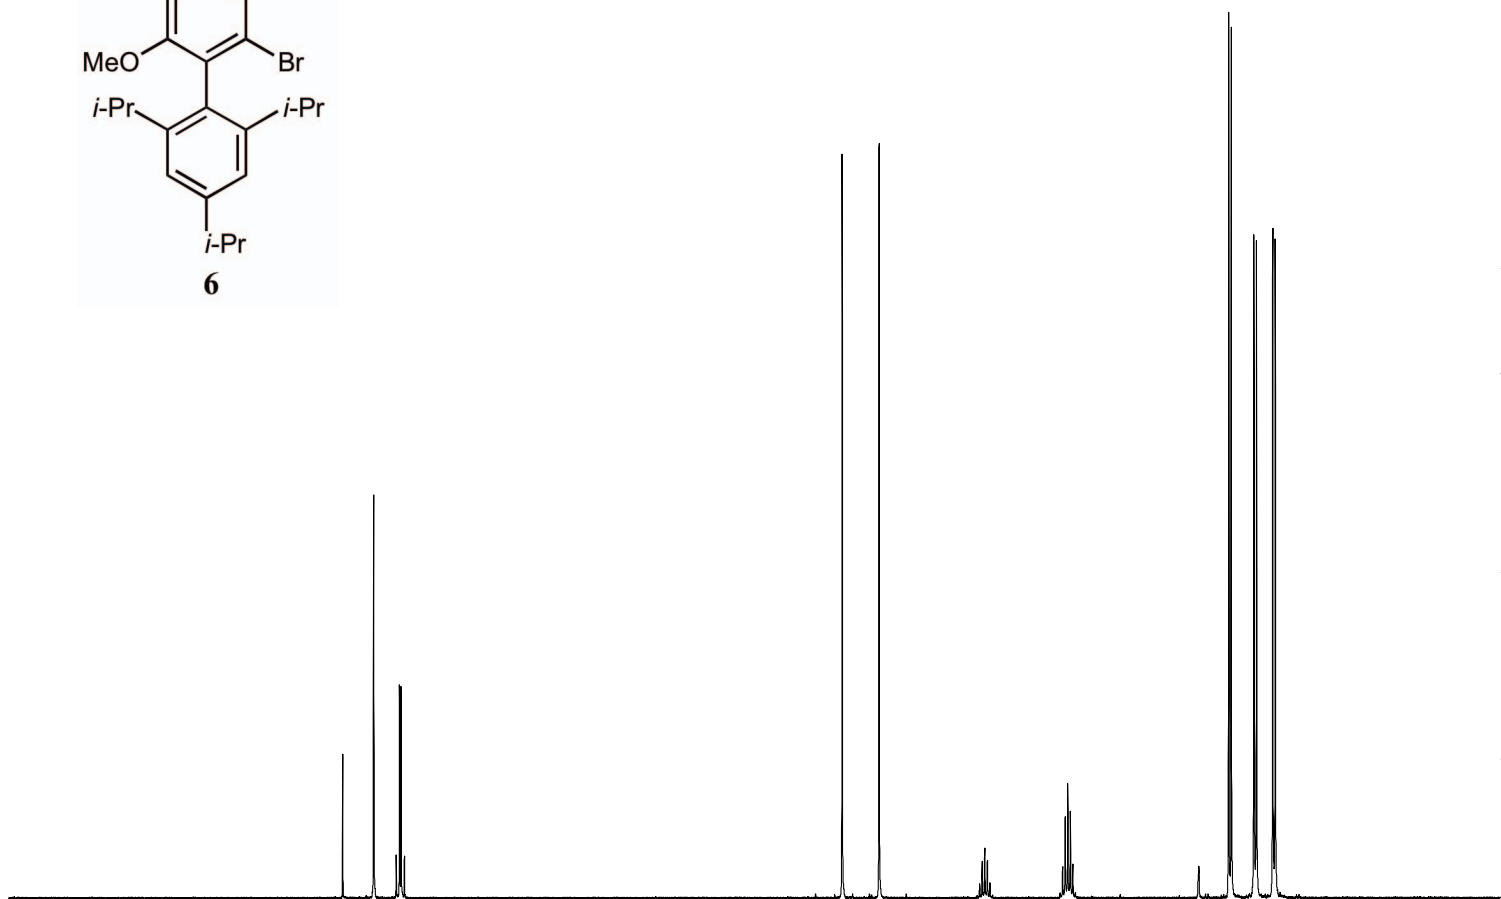

2.05  
2.04

3.08  
3.12

1.00

2.05

6.30  
6.33  
6.32

9 8 7 6 5 4 3 2 1 ppm

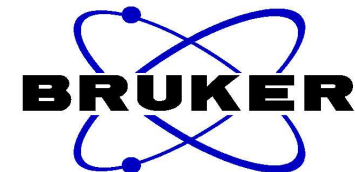

Current Data Parameters  
 NAME NH5-68-13C  
 EXPNO 1  
 PROCNO 1

F2 - Acquisition Parameters  
 Date\_ 20111203  
 Time 14.31  
 INSTRUM spect  
 PROBHD 5 mm BBO BB-1H  
 PULPROG zgpg30  
 TD 65536  
 SOLVENT CDC13  
 NS 256  
 DS 2  
 SWH 23980.814 Hz  
 FIDRES 0.365918 Hz  
 AQ 1.3664756 sec  
 RG 5792.6  
 DW 20.850 usec  
 DE 6.00 usec  
 TE 298.2 K  
 D1 2.00000000 sec  
 d11 0.03000000 sec  
 DELTA 1.89999998 sec  
 TD0 1

==== CHANNEL f1 =====  
 NUC1 13C  
 P1 8.75 usec  
 PL1 -3.00 dB  
 SFO1 100.6228298 MHz

==== CHANNEL f2 =====  
 CPDPRG2 waltz16  
 NUC2 1H  
 PCPD2 90.00 usec  
 PL2 -1.00 dB  
 PL12 14.52 dB  
 PL13 18.00 dB  
 SFO2 400.1316005 MHz

F2 - Processing parameters  
 SI 65536  
 SF 100.6127769 MHz  
 WDW no  
 SSB 0  
 LB 0.00 Hz  
 GB 0  
 PC 1.40

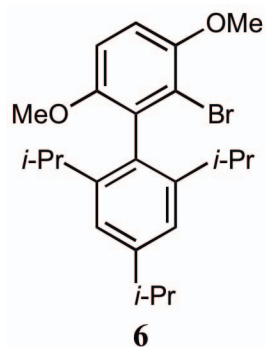

152.57  
150.20  
147.96  
145.97  
132.23  
131.93  
120.55  
116.02  
110.18  
109.02  
56.54  
55.54  
34.00  
30.84  
24.34  
23.97  
23.73

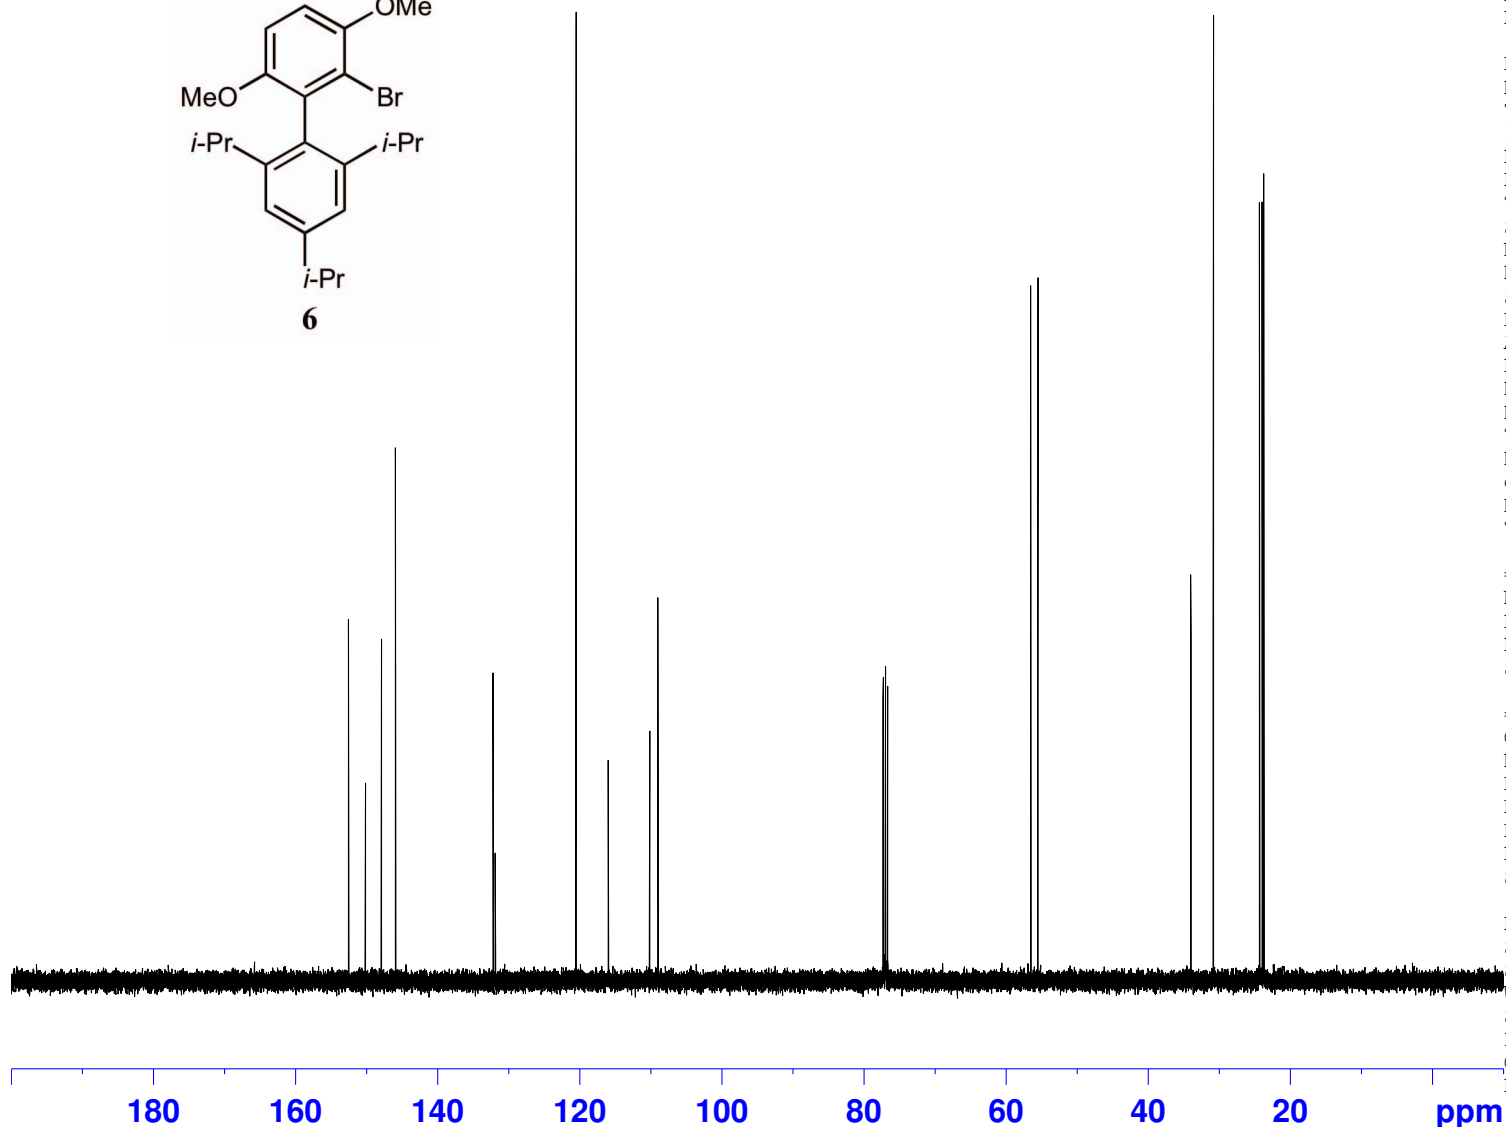

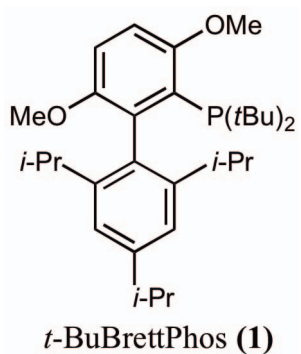

6.981  
6.896  
6.874  
6.851  
6.829

3.794  
3.565  
3.016  
2.999  
2.982  
2.965  
2.948  
2.930  
2.913  
2.566  
2.549  
2.532  
2.515  
2.498  
2.482  
2.465  
1.344  
1.327  
1.240  
1.224  
1.160  
1.130  
0.964  
0.948

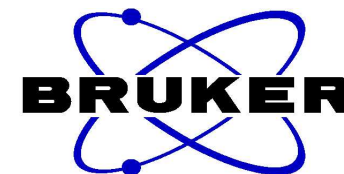

Current Data Parameters  
NAME NH5-105-1H  
EXPNO 1  
PROCNO 1

F2 - Acquisition Parameters  
Date\_ 20120106  
Time 19.29  
INSTRUM spect  
PROBHD 5 mm QNP 1H/13  
PULPROG zg30  
TD 65536  
SOLVENT CDC13  
NS 16  
DS 2  
SWH 8278.146 Hz  
FIDRES 0.126314 Hz  
AQ 3.9584243 sec  
RG 912.3  
DW 60.400 usec  
DE 6.00 usec  
TE 683.2 K  
D1 1.00000000 sec  
TD0 1

===== CHANNEL f1 =====  
NUC1 1H  
P1 14.00 usec  
PL1 0.00 dB  
SFO1 400.1324710 MHz

F2 - Processing parameters  
SI 65536  
SF 400.1300098 MHz  
WDW no  
SSB 0  
LB 0.00 Hz  
GB 0  
PC 1.00

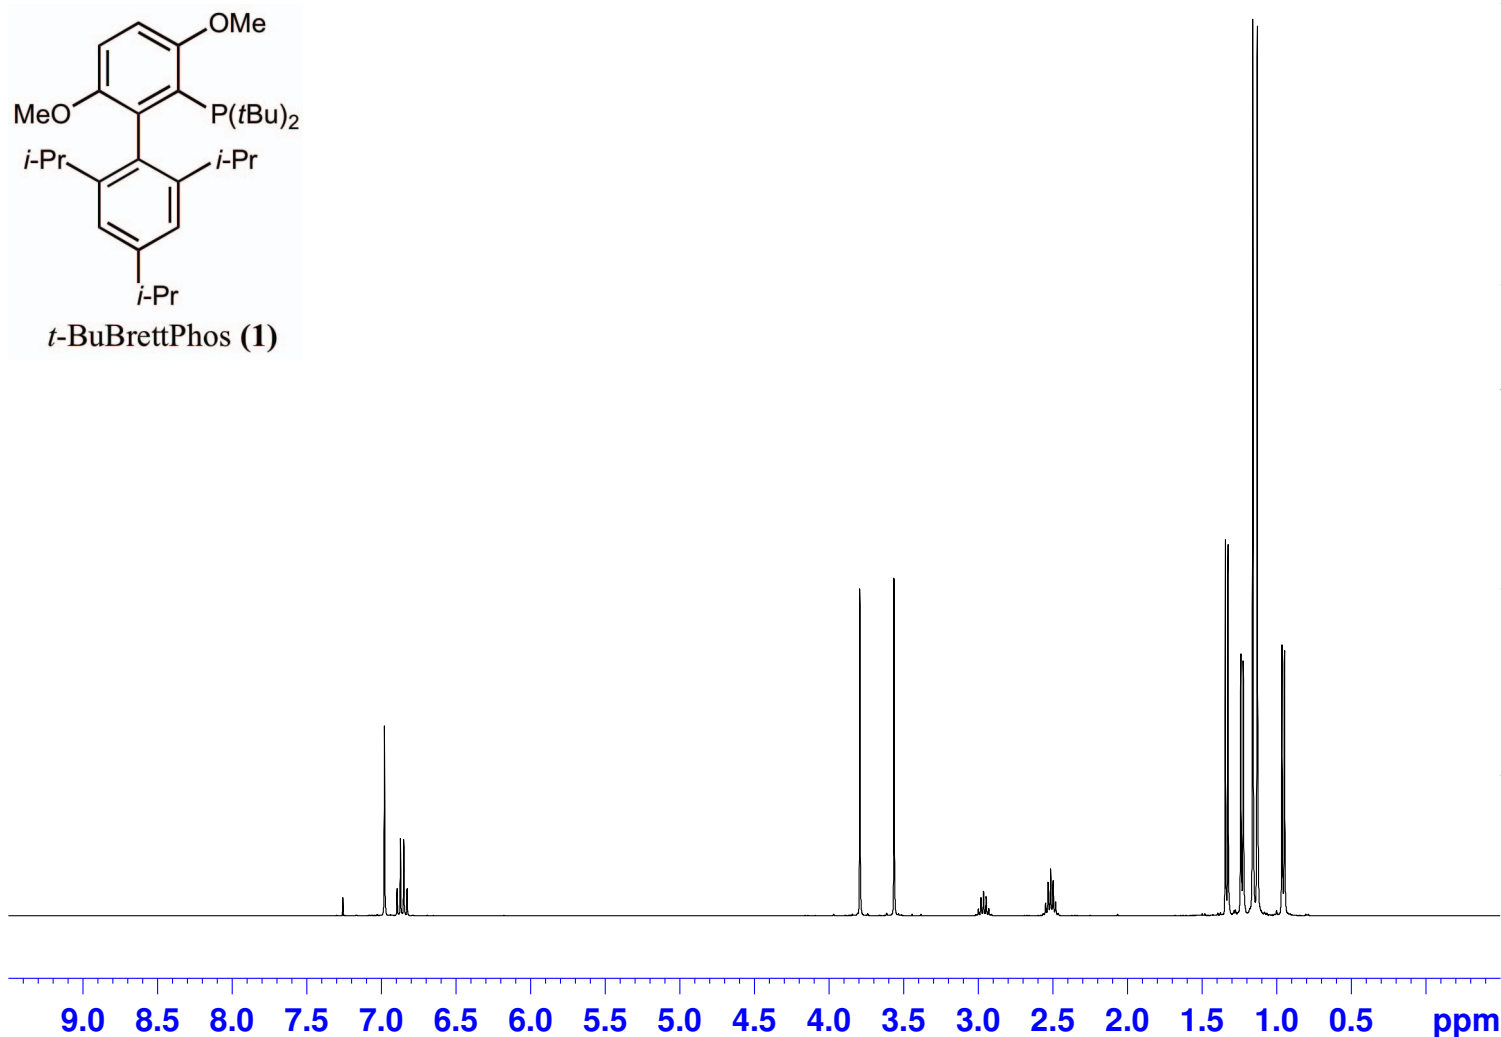

2.00  
2.00

3.04  
3.02

0.95  
1.99

6.30  
6.41  
18.44  
6.19

ppm

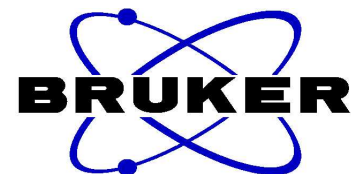

Current Data Parameters  
 NAME NH5-105-13C  
 EXPNO 1  
 PROCNO 1

F2 - Acquisition Parameters  
 Date\_ 20120106  
 Time 19.45  
 INSTRUM spect  
 PROBHD 5 mm QNP 1H/13  
 PULPROG zgpg30  
 TD 65536  
 SOLVENT CDC13  
 NS 256  
 DS 4  
 SWH 23980.814 Hz  
 FIDRES 0.365918 Hz  
 AQ 1.3664756 sec  
 RG 1625.5  
 DW 20.850 usec  
 DE 6.00 usec  
 TE 683.2 K  
 D1 2.00000000 sec  
 d11 0.03000000 sec  
 DELTA 1.89999998 sec  
 TD0 1

==== CHANNEL f1 =====  
 NUC1 13C  
 P1 9.38 usec  
 PL1 0.00 dB  
 SFO1 100.6228298 MHz

==== CHANNEL f2 =====  
 CPDPRG2 waltz16  
 NUC2 1H  
 PCPD2 90.00 usec  
 PL2 0.00 dB  
 PL12 16.10 dB  
 PL13 19.00 dB  
 SFO2 400.1316005 MHz

F2 - Processing parameters  
 SI 32768  
 SF 100.6127733 MHz  
 WDW no  
 SSB 0  
 LB 0.00 Hz  
 GB 0  
 PC 1.40

155.68  
 155.66  
 152.38  
 152.27  
 146.96  
 146.46  
 140.18  
 139.80  
 132.79  
 132.72  
 127.37  
 126.91  
 119.85  
 110.66  
 110.65  
 108.00

54.17  
 53.77  
 33.91  
 33.88  
 33.62  
 31.81  
 31.64  
 31.02  
 30.99  
 25.47  
 24.08  
 23.36

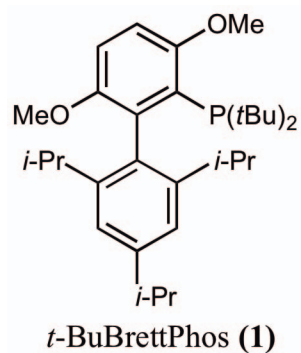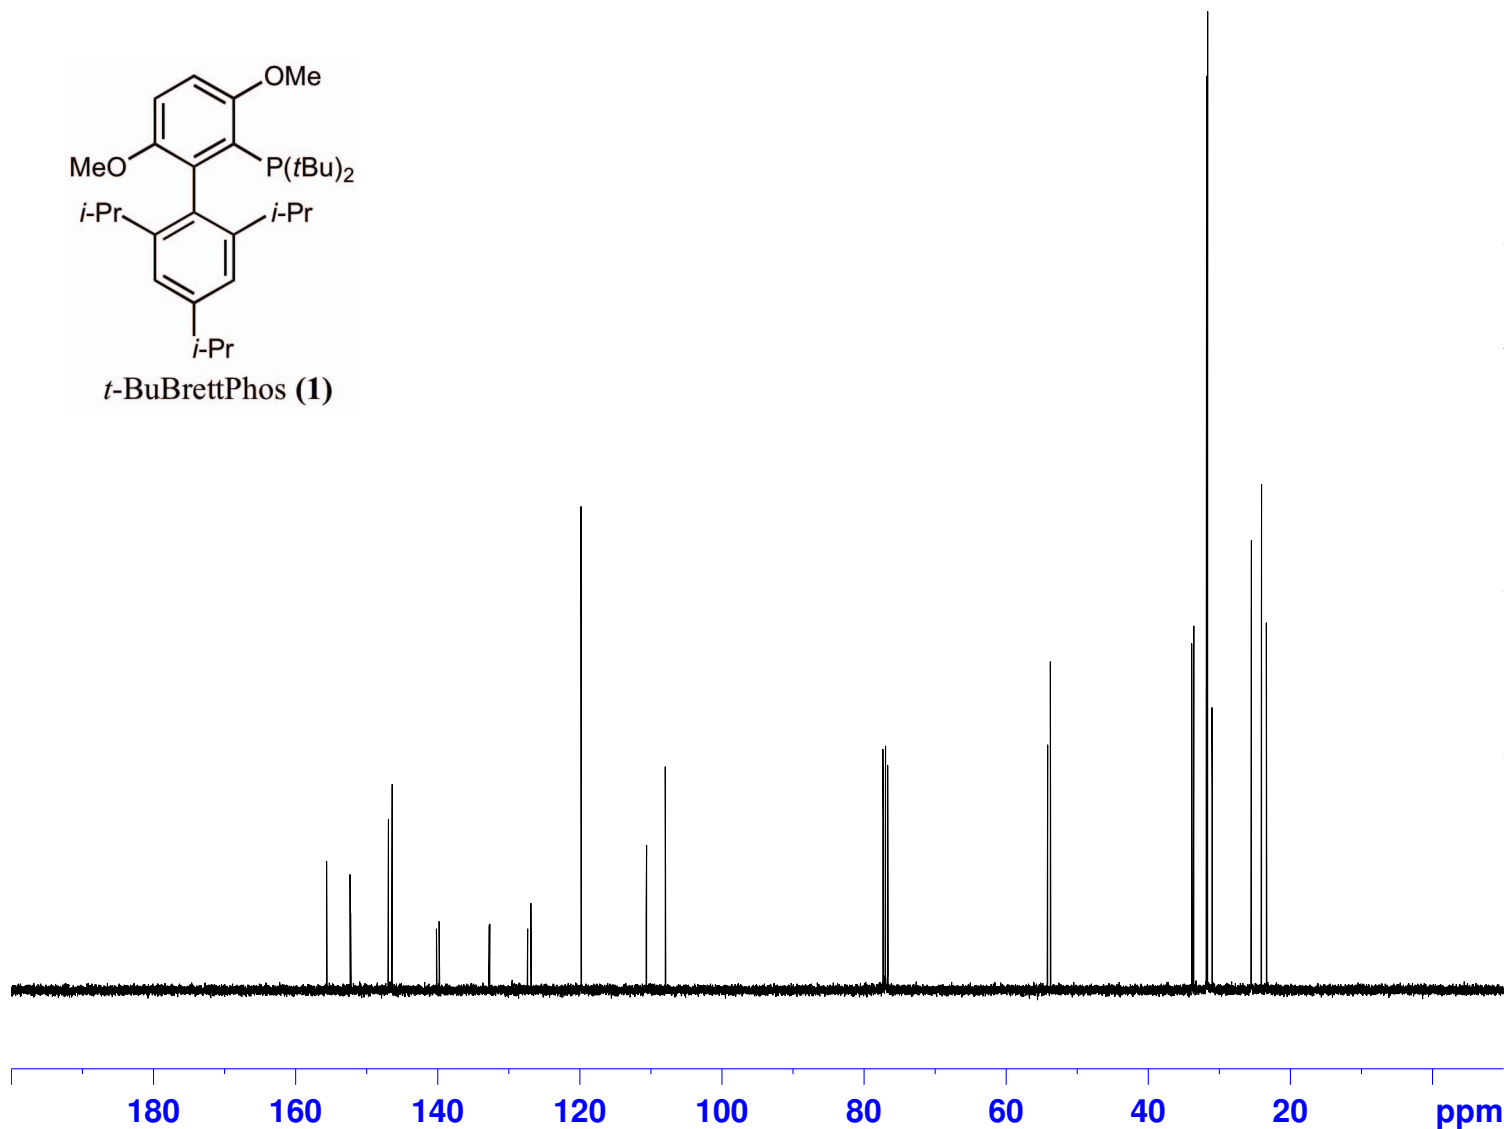



Current Data Parameters  
NAME NH5-105-31P  
EXPNO 1  
PROCNO 1

F2 - Acquisition Parameters  
Date\_ 20120106  
Time 19.27  
INSTRUM spect  
PROBHD 5 mm QNP 1H/13  
PULPROG zgpg30  
TD 65536  
SOLVENT CDCl3  
NS 8  
DS 4  
SWH 75187.969 Hz  
FIDRES 1.147277 Hz  
AQ 0.4358644 sec  
RG 4597.6  
DW 6.650 usec  
DE 6.00 usec  
TE 683.2 K  
D1 2.00000000 sec  
d11 0.03000000 sec  
DELTA 1.89999998 sec  
TD0 1

=====  
CHANNEL f1  
NUC1 31P  
P1 9.25 usec  
PL1 3.00 dB  
SFO1 161.9836918 MHz

=====  
CHANNEL f2  
CPDPRG2 waltz16  
NUC2 1H  
PCPD2 90.00 usec  
PL2 0.00 dB  
PL12 16.10 dB  
PL13 19.00 dB  
SFO2 400.1316000 MHz

F2 - Processing parameters  
SI 65536  
SF 161.9755024 MHz  
WDW no  
SSB 0  
LB 0.00 Hz  
GB 0  
PC 1.40

34.56

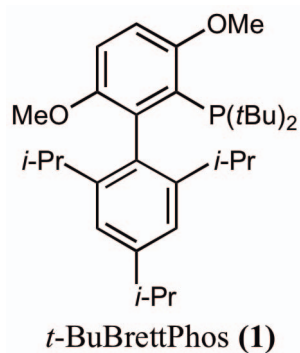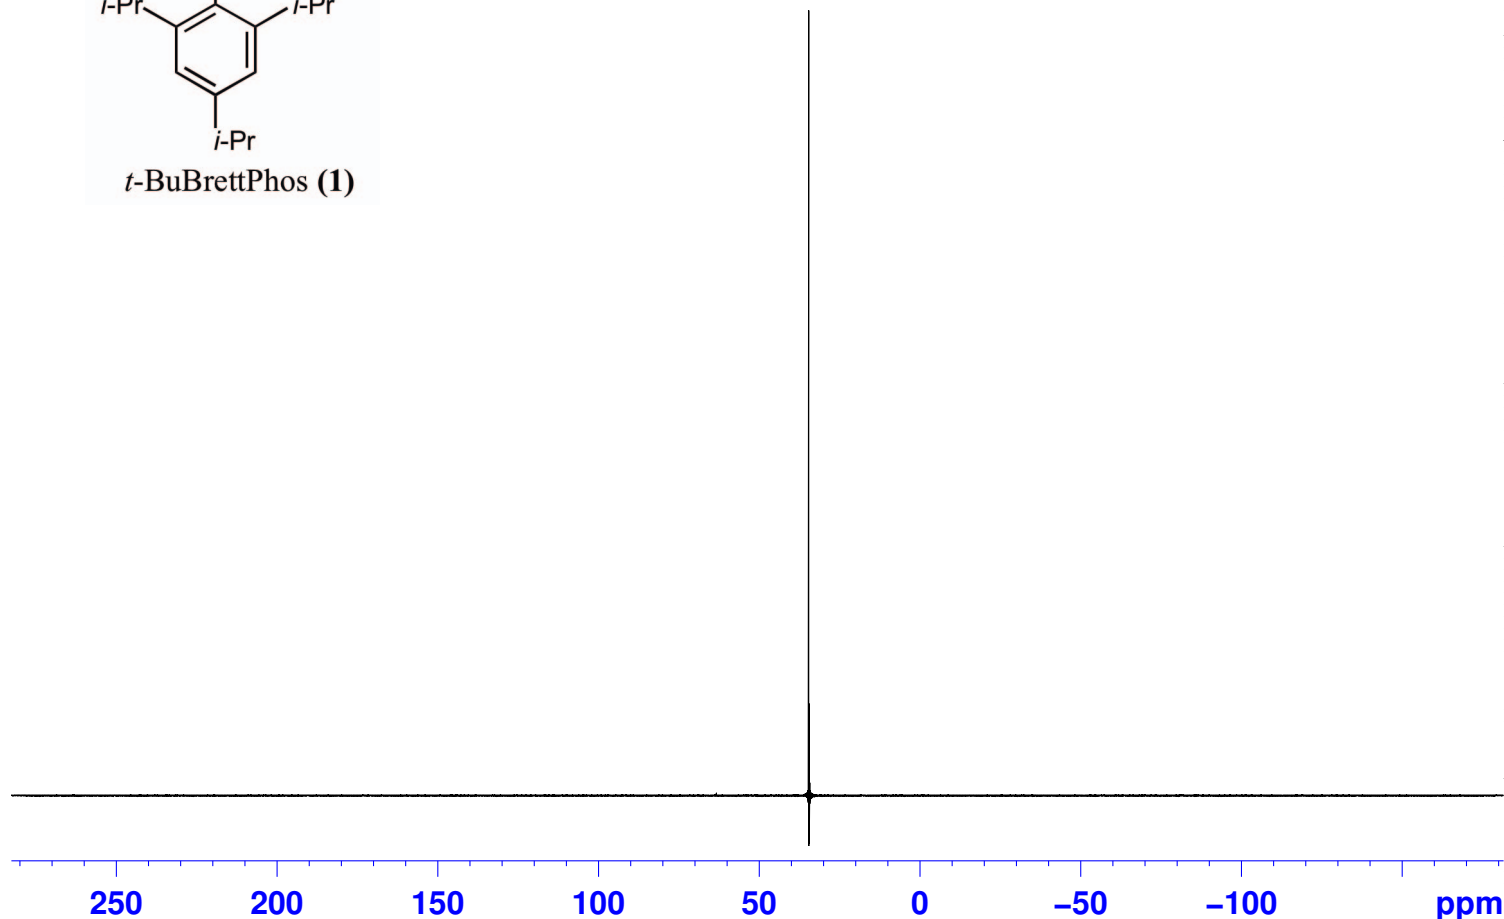

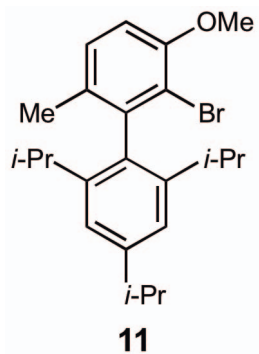

7.196  
7.175  
7.081  
6.847  
6.826

3.935  
3.020  
3.002  
2.985  
2.967  
2.950  
2.933  
2.916  
2.430  
2.413  
2.396  
2.379  
2.362  
2.345  
2.328  
1.948  
1.330  
1.313  
1.169  
1.152  
1.087  
1.070

Current Data Parameters  
 NAME NH5-79-1st-cry-H  
 EXPNO 1  
 PROCNO 1

F2 - Acquisition Parameters  
 Date\_ 20111203  
 Time 14.35  
 INSTRUM spect  
 PROBHD 5 mm BBO BB-1H  
 PULPROG zg30  
 TD 65536  
 SOLVENT CDC13  
 NS 8  
 DS 2  
 SWH 8278.146 Hz  
 FIDRES 0.126314 Hz  
 AQ 3.9584243 sec  
 RG 35.9  
 DW 60.400 usec  
 DE 6.00 usec  
 TE 298.2 K  
 D1 1.00000000 sec  
 TD0 1

===== CHANNEL f1 =====  
 NUC1 1H  
 P1 15.07 usec  
 PL1 0.00 dB  
 SFO1 400.1324710 MHz

F2 - Processing parameters  
 SI 65536  
 SF 400.1300092 MHz  
 WDW no  
 SSB 0  
 LB 0.00 Hz  
 GB 0  
 PC 1.00

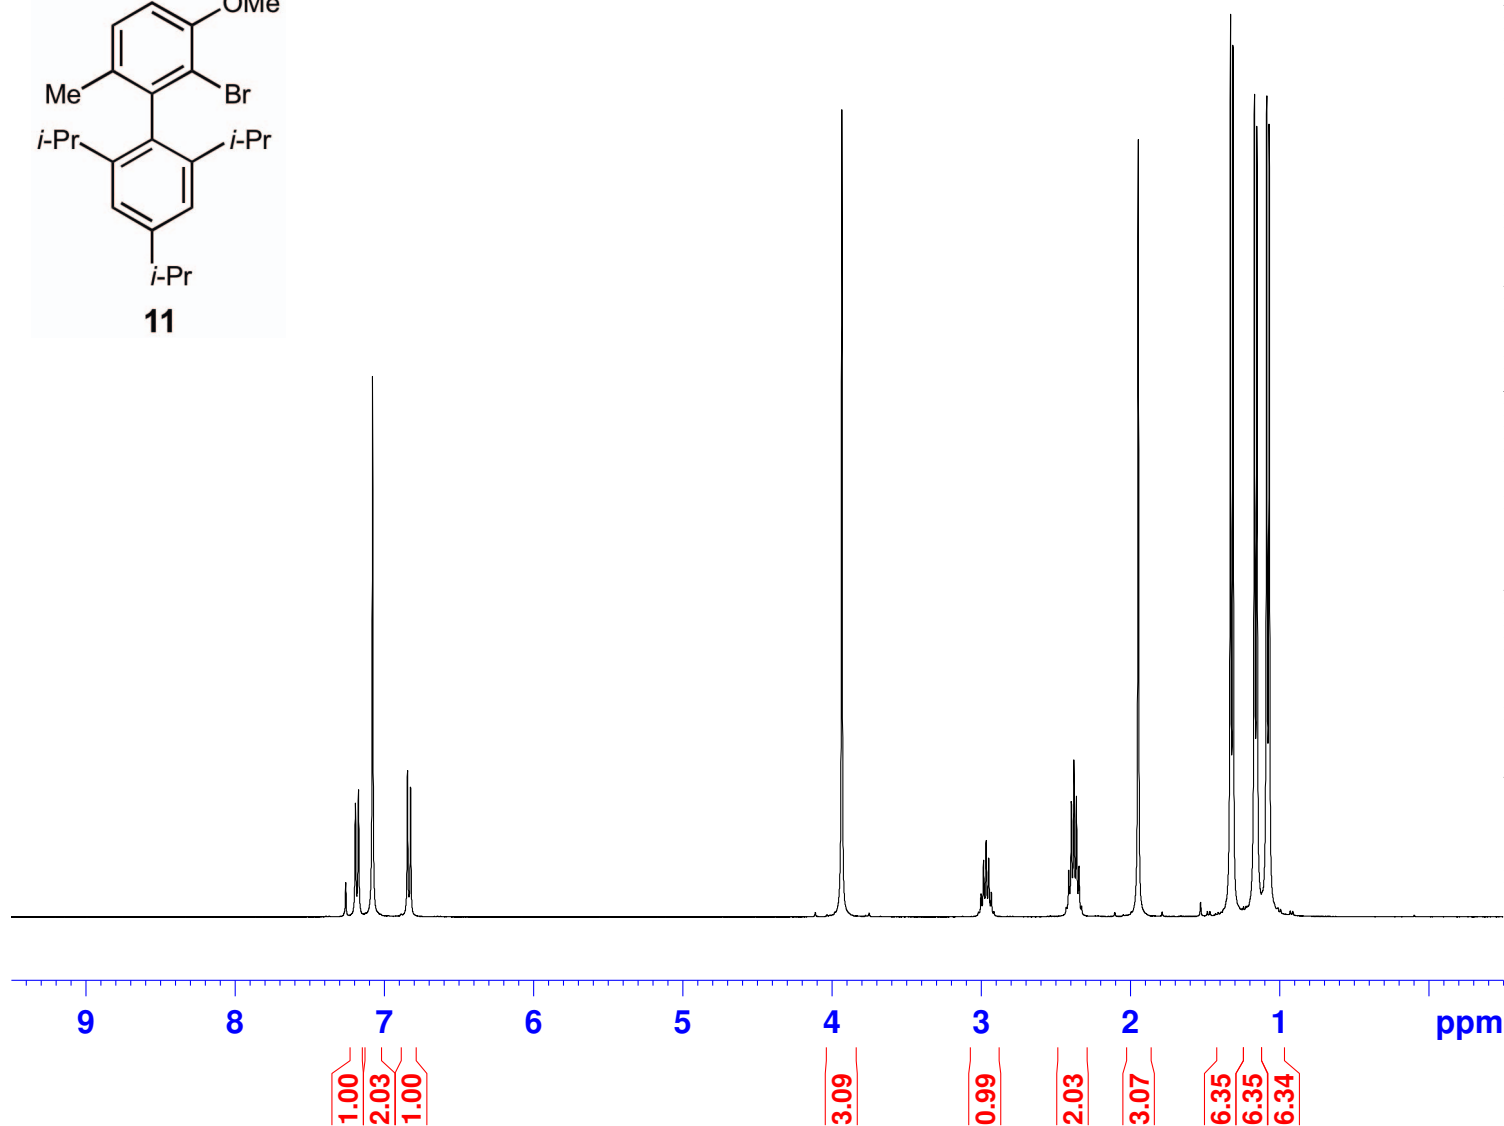



Current Data Parameters  
NAME NH5-79-1st-cry-13C  
EXPNO 1  
PROCNO 1

F2 - Acquisition Parameters  
Date\_ 20111203  
Time 14.51  
INSTRUM spect  
PROBHD 5 mm BBO BB-1H  
PULPROG zgpg30  
TD 65536  
SOLVENT CDC13  
NS 256  
DS 2  
SWH 23980.814 Hz  
FIDRES 0.365918 Hz  
AQ 1.3664756 sec  
RG 18390.4  
DW 20.850 usec  
DE 6.00 usec  
TE 298.2 K  
D1 2.00000000 sec  
d11 0.03000000 sec  
DELTA 1.89999998 sec  
TD0 1

==== CHANNEL f1 =====  
NUC1 13C  
P1 8.75 usec  
PL1 -3.00 dB  
SFO1 100.6228298 MHz

==== CHANNEL f2 =====  
CPDPRG2 waltz16  
NUC2 1H  
PCPD2 90.00 usec  
PL2 -1.00 dB  
PL12 14.52 dB  
PL13 18.00 dB  
SFO2 400.1316005 MHz

F2 - Processing parameters  
SI 65536  
SF 100.6127742 MHz  
WDW no  
SSB 0  
LB 0.00 Hz  
GB 0  
PC 1.40

154.11  
148.24  
145.39  
142.59  
134.70  
130.88  
128.87  
120.96  
114.86  
109.97  
56.17  
34.08  
30.62  
24.51  
24.27  
24.05  
20.56

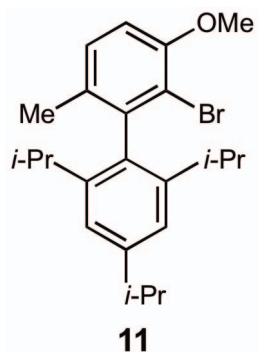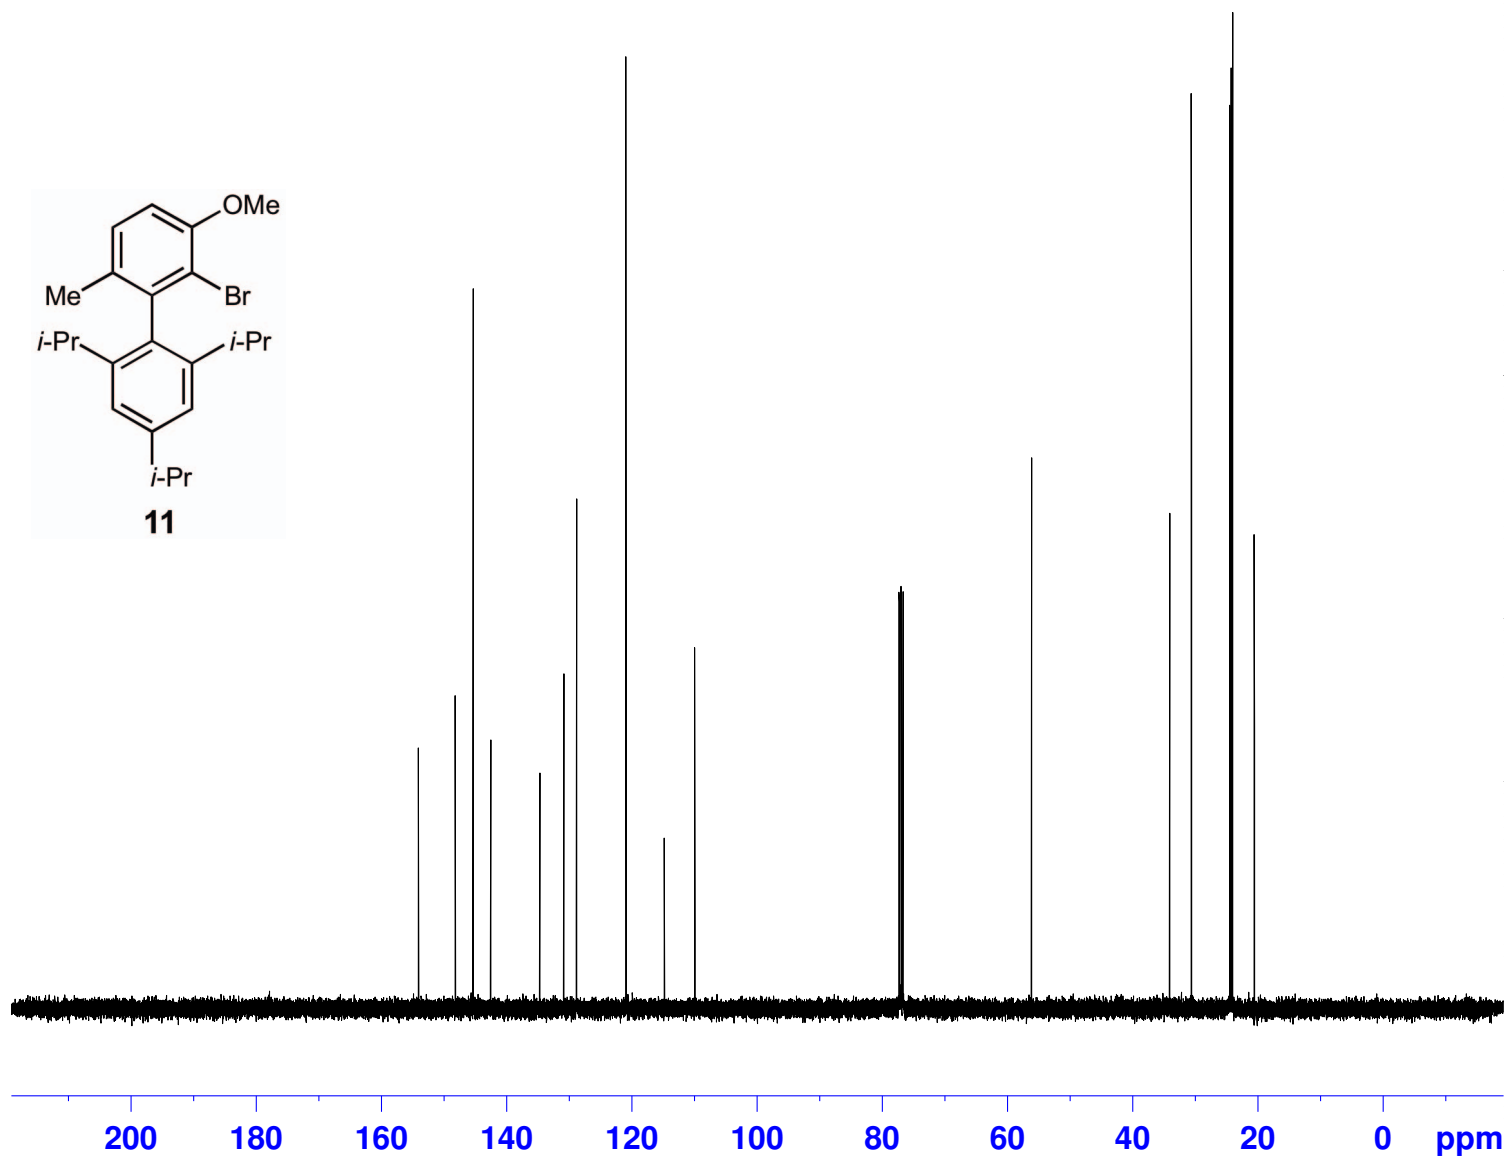



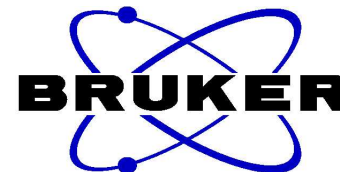

Current Data Parameters  
NAME NH5-90-1H  
EXPNO 1  
PROCNO 1

F2 - Acquisition Parameters  
Date\_ 20120106  
Time 20.13  
INSTRUM spect  
PROBHD 5 mm QNP 1H/13  
PULPROG zg30  
TD 65536  
SOLVENT CDC13  
NS 16  
DS 2  
SWH 8278.146 Hz  
FIDRES 0.126314 Hz  
AQ 3.9584243 sec  
RG 724.1  
DW 60.400 usec  
DE 6.00 usec  
TE 683.2 K  
D1 1.00000000 sec  
TD0 1

===== CHANNEL f1 =====  
NUC1 1H  
P1 14.00 usec  
PL1 0.00 dB  
SFO1 400.1324710 MHz

F2 - Processing parameters  
SI 65536  
SF 400.1300104 MHz  
WDW no  
SSB 0  
LB 0.00 Hz  
GB 0  
PC 1.00

7.231  
7.210  
7.015  
6.823  
6.802

3.814  
3.008  
2.991  
2.974  
2.956  
2.939  
2.922  
2.904  
2.562  
2.545  
2.529  
2.512  
2.495  
2.478  
2.462  
1.808  
1.334  
1.317  
1.259  
1.243  
1.189  
1.159  
1.007  
0.990

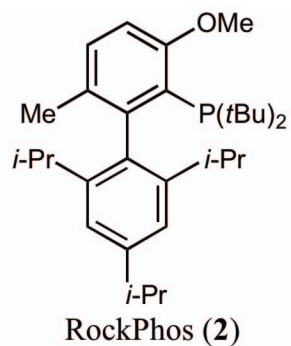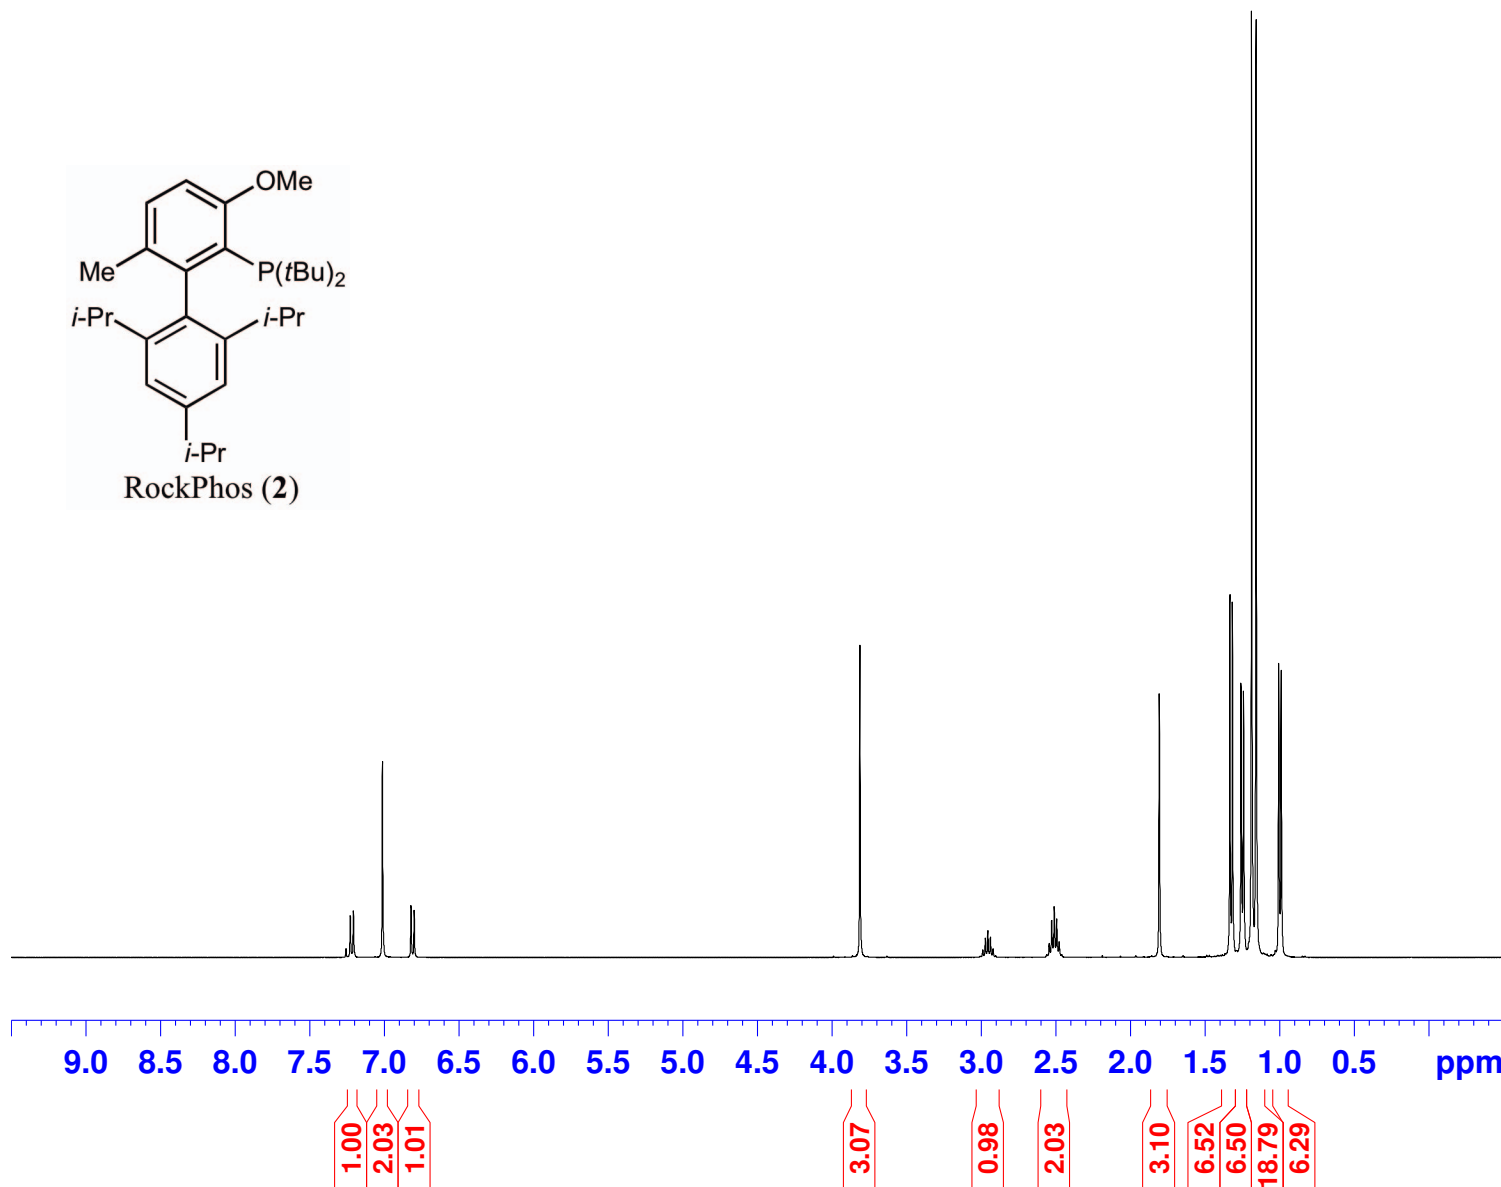



Current Data Parameters  
 NAME NH5-90-13C  
 EXPNO 1  
 PROCNO 1

F2 - Acquisition Parameters  
 Date\_ 20120106  
 Time 20.29  
 INSTRUM spect  
 PROBHD 5 mm QNP 1H/13  
 PULPROG zgpg30  
 TD 65536  
 SOLVENT CDC13  
 NS 256  
 DS 4  
 SWH 23980.814 Hz  
 FIDRES 0.365918 Hz  
 AQ 1.3664756 sec  
 RG 3649.1  
 DW 20.850 usec  
 DE 6.00 usec  
 TE 683.2 K  
 D1 2.00000000 sec  
 d11 0.03000000 sec  
 DELTA 1.89999998 sec  
 TD0 1

==== CHANNEL f1 =====  
 NUC1 13C  
 P1 9.38 usec  
 PL1 0.00 dB  
 SFO1 100.6228298 MHz

==== CHANNEL f2 =====  
 CPDPRG2 waltz16  
 NUC2 1H  
 PCPD2 90.00 usec  
 PL2 0.00 dB  
 PL12 16.10 dB  
 PL13 19.00 dB  
 SFO2 400.1316005 MHz

F2 - Processing parameters  
 SI 32768  
 SF 100.6127724 MHz  
 WDW no  
 SSB 0  
 LB 0.00 Hz  
 GB 0  
 PC 1.40

160.05  
 160.03  
 150.97  
 150.59  
 147.33  
 145.72  
 145.71  
 136.55  
 136.48  
 131.91  
 131.90  
 130.54  
 130.46  
 125.46  
 125.01  
 120.74  
 108.19

53.58  
 34.13  
 33.99  
 33.84  
 32.01  
 31.85  
 30.79  
 30.77  
 25.35  
 24.66  
 24.64  
 24.17  
 22.17  
 22.15

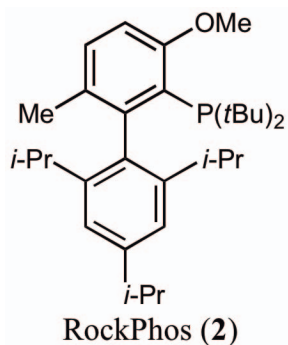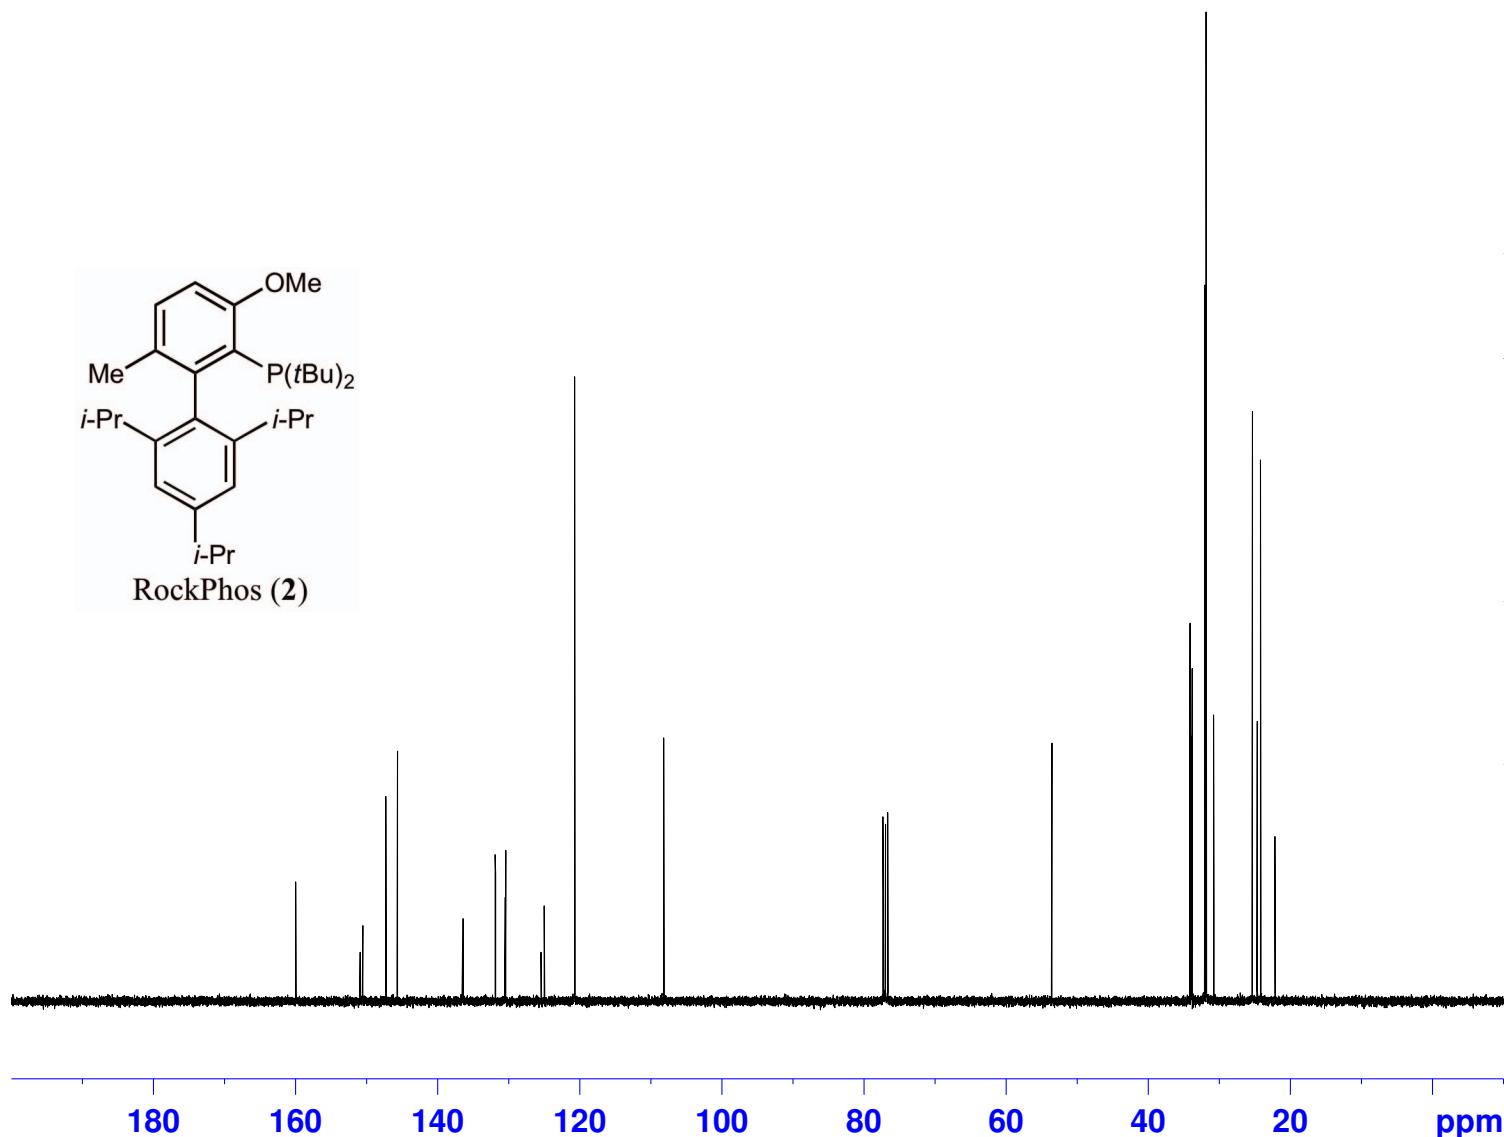



Current Data Parameters  
NAME NH5-90-31P  
EXPNO 1  
PROCNO 1

F2 - Acquisition Parameters  
Date\_ 20120106  
Time 20.11  
INSTRUM spect  
PROBHD 5 mm QNP 1H/13  
PULPROG zgpg30  
TD 65536  
SOLVENT CDCl3  
NS 16  
DS 4  
SWH 75187.969 Hz  
FIDRES 1.147277 Hz  
AQ 0.4358644 sec  
RG 3251  
DW 6.650 usec  
DE 6.00 usec  
TE 683.2 K  
D1 2.00000000 sec  
d11 0.03000000 sec  
DELTA 1.89999998 sec  
TD0 1

=====  
CHANNEL f1  
NUC1 31P  
P1 9.25 usec  
PL1 3.00 dB  
SFO1 161.9836918 MHz

=====  
CHANNEL f2  
CPDPRG2 waltz16  
NUC2 1H  
PCPD2 90.00 usec  
PL2 0.00 dB  
PL12 16.10 dB  
PL13 19.00 dB  
SFO2 400.1316000 MHz

F2 - Processing parameters  
SI 65536  
SF 161.9755024 MHz  
WDW no  
SSB 0  
LB 0.00 Hz  
GB 0  
PC 1.40

35.71

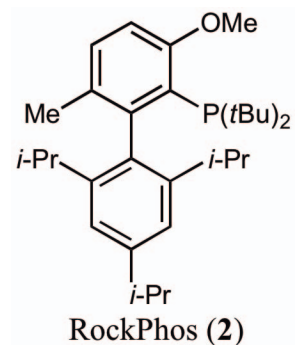

250 200 150 100 50 0 -50 -100 ppm

6.983  
6.873  
6.851  
6.810  
6.788  
3.832  
3.569  
2.990  
2.973  
2.956  
2.939  
2.921  
2.498  
2.482  
2.465  
2.448  
2.431  
2.414  
2.398  
2.254  
2.246  
2.238  
2.231  
2.224  
2.216  
2.208  
2.201  
2.193  
2.186  
2.178  
1.847  
1.818  
1.728  
1.696  
1.657  
1.638  
1.431  
1.398  
1.339  
1.321  
1.303  
1.299  
1.291  
1.260  
1.229  
1.212  
1.181  
1.171  
1.163  
1.149  
1.141  
1.133  
1.118  
1.111  
0.989  
0.980  
0.958  
0.941



Current Data Parameters  
 NAME NH5-104-1H  
 EXPNO 1  
 PROCNO 1

F2 - Acquisition Parameters  
 Date\_ 20120106  
 Time 19.51  
 INSTRUM spect  
 PROBHD 5 mm QNP 1H/13  
 PULPROG zg30  
 TD 65536  
 SOLVENT CDC13  
 NS 16  
 DS 2  
 SWH 8278.146 Hz  
 FIDRES 0.126314 Hz  
 AQ 3.9584243 sec  
 RG 1149.4  
 DW 60.400 usec  
 DE 6.00 usec  
 TE 683.2 K  
 D1 1.00000000 sec  
 TD0 1

===== CHANNEL f1 =====  
 NUC1 1H  
 P1 14.00 usec  
 PL1 0.00 dB  
 SFO1 400.1324710 MHz

F2 - Processing parameters  
 SI 65536  
 SF 400.1300097 MHz  
 WDW no  
 SSB 0  
 LB 0.00 Hz  
 GB 0  
 PC 1.00

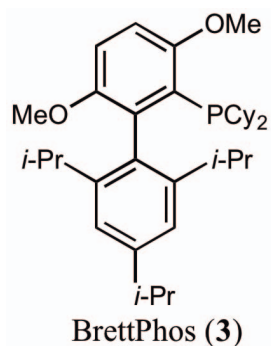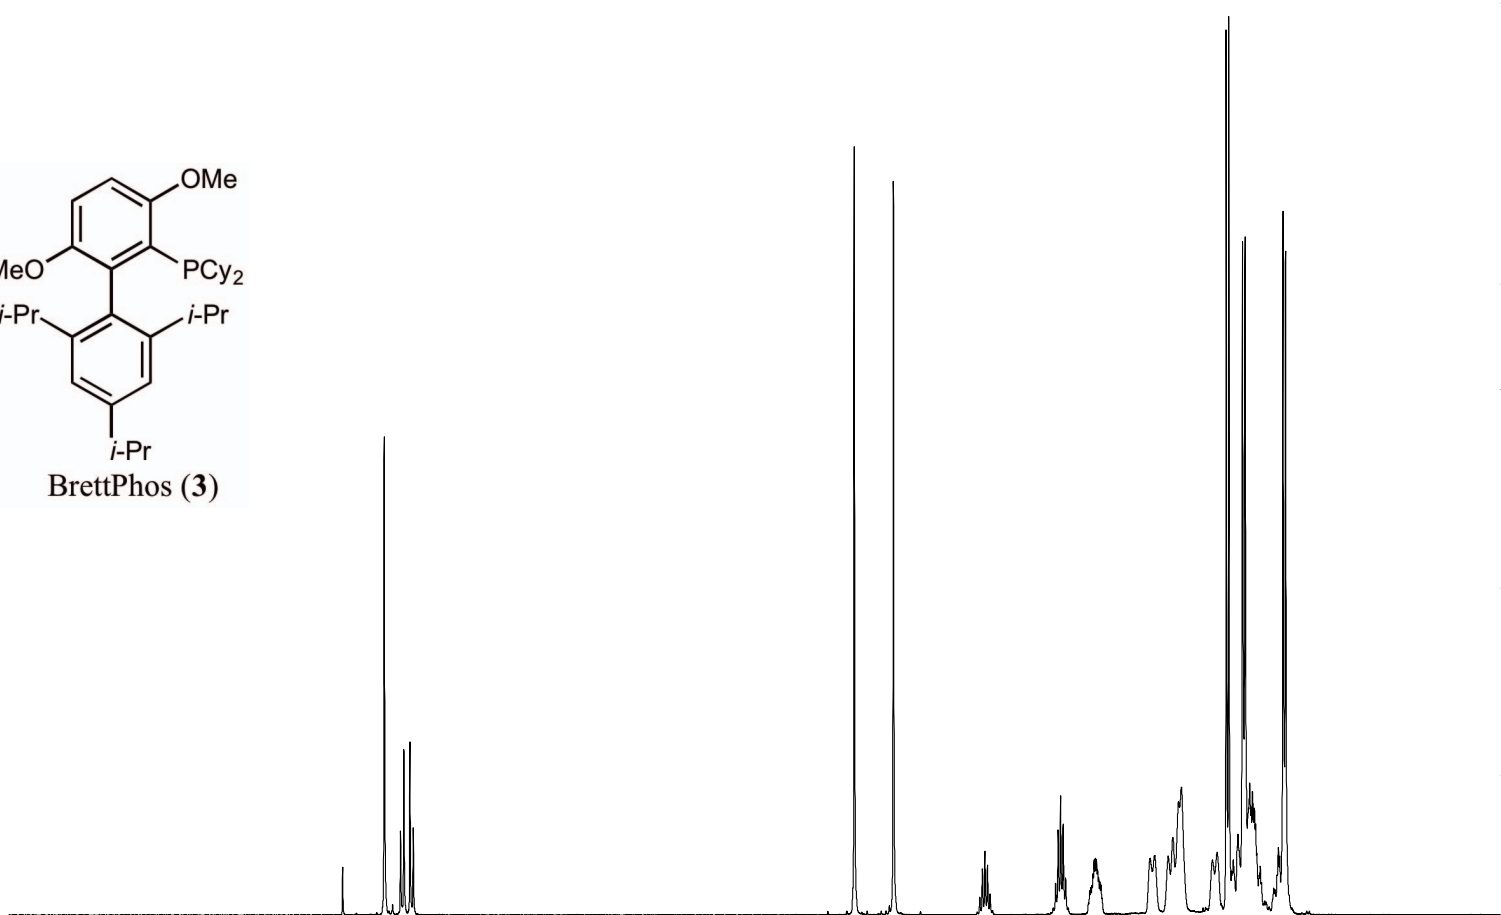

9 8 7 6 5 4 3 2 1 ppm

2.00  
2.03

3.09  
3.11

0.97

2.04  
2.04

2.12  
6.31

2.23  
21.22  
8.42



Current Data Parameters  
NAME NH5-104-13C  
EXPNO 1  
PROCNO 1

F2 - Acquisition Parameters  
Date\_ 20120106  
Time 20.07  
INSTRUM spect  
PROBHD 5 mm QNP 1H/13  
PULPROG zgpg30  
TD 65536  
SOLVENT CDC13  
NS 256  
DS 4  
SWH 23980.814 Hz  
FIDRES 0.365918 Hz  
AQ 1.3664756 sec  
RG 1625.5  
DW 20.850 usec  
DE 6.00 usec  
TE 683.2 K  
D1 2.00000000 sec  
d11 0.03000000 sec  
DELTA 1.89999998 sec  
TD0 1

==== CHANNEL f1 =====  
NUC1 13C  
P1 9.38 usec  
PL1 0.00 dB  
SFO1 100.6228298 MHz

==== CHANNEL f2 =====  
CPDPRG2 waltz16  
NUC2 1H  
PCPD2 90.00 usec  
PL2 0.00 dB  
PL12 16.10 dB  
PL13 19.00 dB  
SFO2 400.1316005 MHz

F2 - Processing parameters  
SI 32768  
SF 100.6127740 MHz  
WDW no  
SSB 0  
LB 0.00 Hz  
GB 0  
PC 1.40

156.29  
156.27  
152.29  
152.18  
146.82  
145.88  
145.86  
139.19  
138.83  
132.64  
132.56  
126.79  
126.51  
120.04  
110.60  
108.51

55.05  
54.53  
36.63  
36.49  
33.76  
32.94  
32.71  
30.96  
30.85  
30.47  
27.97  
27.88  
27.59  
27.45  
26.49  
26.48  
25.05  
23.95  
23.52

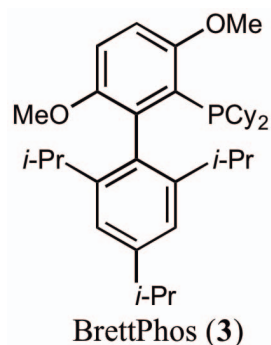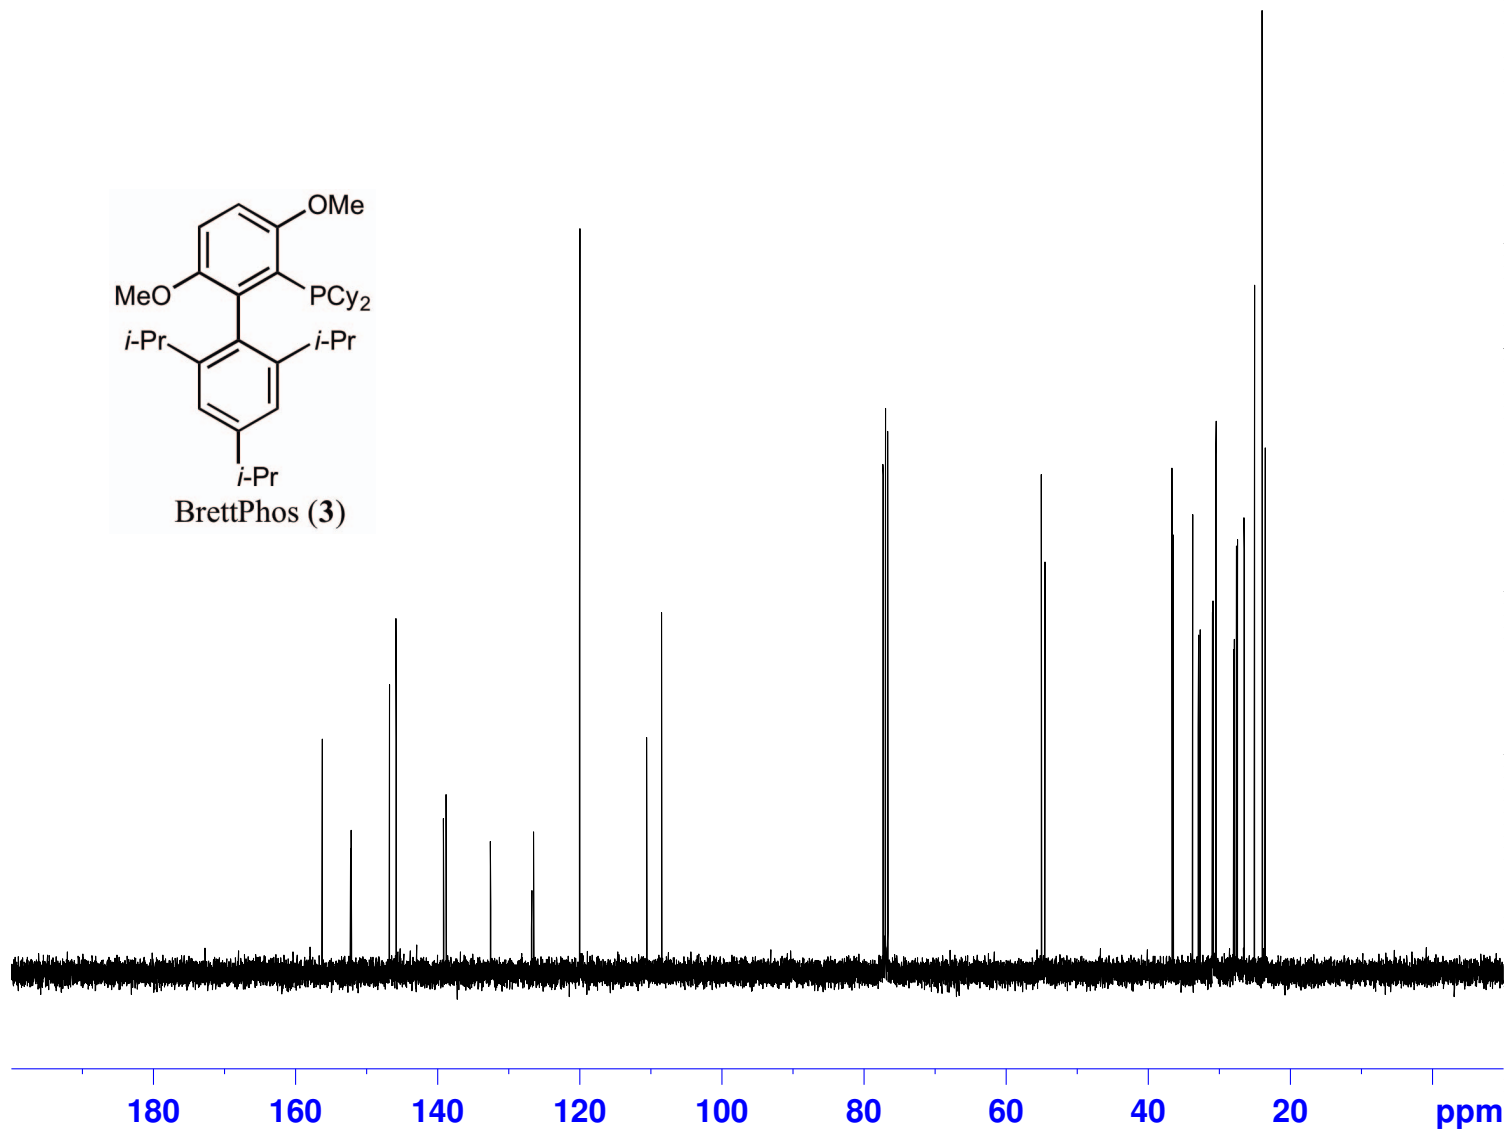

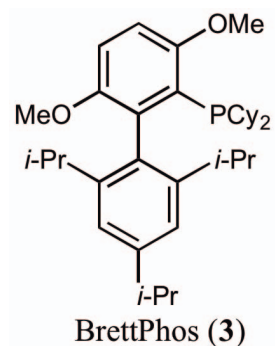

1.61

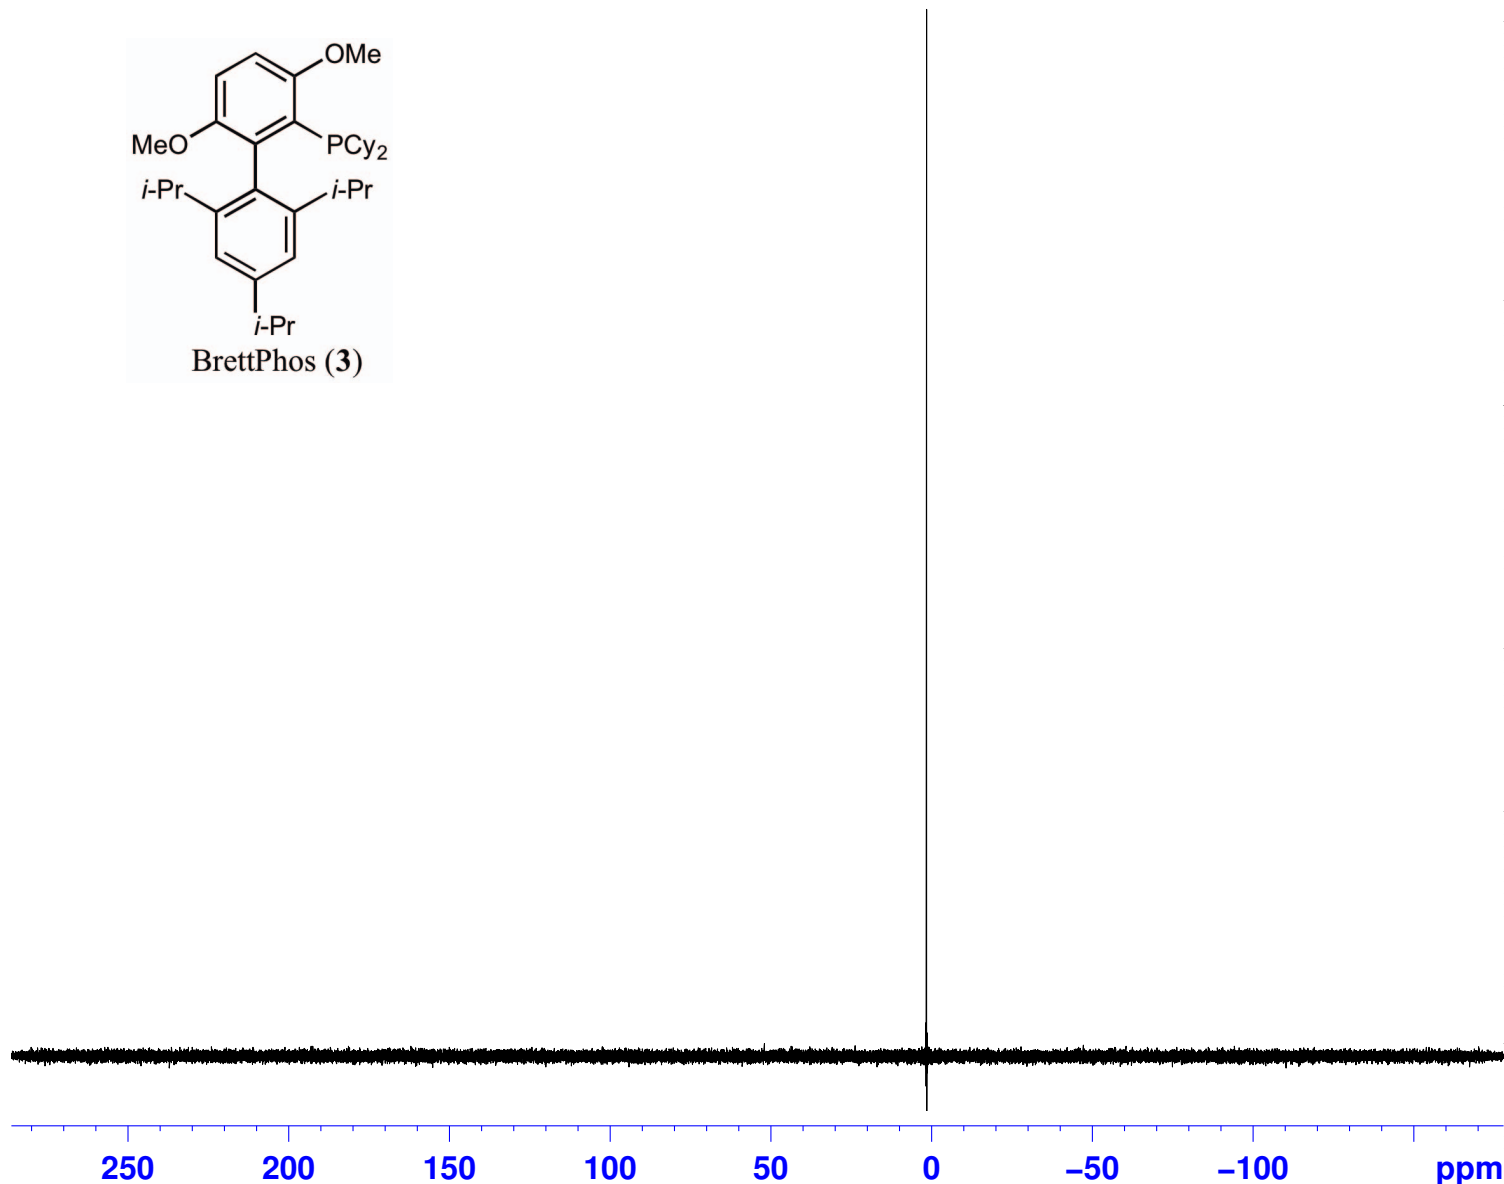

Current Data Parameters  
NAME NH5-104-1st-cry-31P  
EXPNO 1  
PROCNO 1

F2 - Acquisition Parameters  
Date\_ 20120102  
Time 14.55  
INSTRUM spect  
PROBHD 5 mm QNP 1H/13  
PULPROG zgpg30  
TD 65536  
SOLVENT CDCl3  
NS 8  
DS 4  
SWH 75187.969 Hz  
FIDRES 1.147277 Hz  
AQ 0.4358644 sec  
RG 11585.2  
DW 6.650 usec  
DE 6.00 usec  
TE 683.2 K  
D1 2.00000000 sec  
d11 0.03000000 sec  
DELTA 1.89999998 sec  
TD0 1

==== CHANNEL f1 =====  
NUC1 31P  
P1 9.25 usec  
PL1 3.00 dB  
SFO1 161.9836918 MHz

==== CHANNEL f2 =====  
CPDPRG2 waltz16  
NUC2 1H  
PCPD2 90.00 usec  
PL2 0.00 dB  
PL12 16.10 dB  
PL13 19.00 dB  
SFO2 400.1316000 MHz

F2 - Processing parameters  
SI 65536  
SF 161.9749159 MHz  
WDW no  
SSB 0  
LB 0.00 Hz  
GB 0  
PC 1.40
